# Supplementary material
Source: PubMed Central journal article supplement (PMC9975087)
Supplement: NIHMS1871651-supplement-1.pdf [file NIHMS1871651-supplement-1.pdf]

**Table S1. List of phage capsid mutations observed via Whole Genome Sequencing.**

| Phage name                                          | Nucleotide location | Nucleotide mutation* | Amino acid location | Amino acid mutation |
|-----------------------------------------------------|---------------------|----------------------|---------------------|---------------------|
| <b>PaMx41<math>\Delta</math>acb2 Escapers (ESC)</b> |                     |                      |                     |                     |
| ESC 1                                               | 9371                | T→C                  | 330                 | S→P                 |
| ESC 2                                               | 8745                | T→G                  | 121                 | I→S                 |
| ESC 3                                               | 9371                | T→C                  | 330                 | S→P                 |
| ESC 4                                               | 9371                | T→C                  | 330                 | S→P                 |
| ESC 5                                               | 9363                | T→C                  | 327                 | I→T                 |
| ESC 6                                               | 8745                | T→C                  | 121                 | I→T                 |
| ESC 7                                               | 8745                | T→C                  | 121                 | I→T                 |
| <b>JBD67<math>\Delta</math>acb2 ESC</b>             |                     |                      |                     |                     |
| ESC 1                                               | 22601               | T→C                  | 263                 | W→R                 |
| ESC 2                                               | 22601               | T→C                  | 263                 | W→R                 |
| ESC 3                                               | 22601               | T→C                  | 263                 | W→R                 |
| ESC 4                                               | 22385               | A→T                  | 191                 | N→R                 |
| <b>JBD18 WT ESC</b>                                 |                     |                      |                     |                     |
| ESC 1                                               | 22559               | C→T                  | 159                 | A→V                 |
| ESC 2                                               | 22559               | C→T                  | 159                 | A→V                 |
| ESC 3                                               | 22907               | A→C                  | 275                 | N→T                 |
| ESC 4                                               | 22870               | T→C                  | 263                 | W→R                 |

\*Mutations were recorded if the 100% of the reads detected the change in nucleotide relative to the reference genome.
